# Supplementary material for: Should We Pay for Our Social Media/Messenger Applications? Preliminary Data on the Acceptance of an Alternative to the Current Prevailing Data Business Model
Source: Front Psychol. 2020 Jul 14;11:1415. doi: 10.3389/fpsyg.2020.01415 (PMC7371851; doi:10.3389/fpsyg.2020.01415)
Supplement: Supplementary file 2 [file Table_1.XLSX]

## Sheet: Data
gender	age	education	...25	BFI_1	BFI_2	BFI_3	BFI_4	BFI_5	BFI_6	BFI_7	BFI_8	BFI_9	BFI_10	BFI_11	BFI_12	BFI_13	BFI_14	BFI_15	BFI_16	BFI_17	BFI_18	BFI_19	BFI_20	BFI_21	BFI_22	BFI_23	BFI_24	BFI_25	BFI_26	BFI_27	BFI_28	BFI_29	BFI_30	BFI_31	BFI_32	BFI_33	BFI_34	BFI_35	BFI_36	BFI_37	BFI_38	BFI_39	BFI_40	BFI_41	BFI_42	BFI_43	BFI_44	BFI_45	...71
2	25	7	#N/A	4	4	5	2	5	3	3	2	4	5	4	1	5	4	5	5	3	2	4	5	2	3	2	4	3	4	4	3	2	5	3	4	5	5	5	4	3	5	1	5	1	4	2	4	1	#N/A
1	47	7	#N/A	5	2	4	2	1	1	2	4	1	5	5	2	4	2	4	5	4	2	1	5	1	5	1	5	5	4	1	4	2	5	2	5	3	5	1	5	3	1	1	5	1	5	2	3	1	#N/A
2	41	5	#N/A	4	2	4	1	3	4	5	2	5	4	4	1	4	2	3	4	5	3	1	4	4	5	2	5	3	2	2	3	1	4	1	4	4	5	4	4	2	3	3	4	3	5	3	2	1	#N/A
1	36	4	#N/A	3	4	4	4	3	2	4	2	3	5	1	1	5	3	4	2	3	3	2	4	3	3	4	4	3	3	4	4	4	4	3	3	3	4	3	4	4	3	1	5	3	4	2	4	1	#N/A
1	24	5	#N/A	5	4	4	4	4	1	4	3	3	4	3	1	4	2	5	4	3	3	3	4	1	3	3	4	4	4	5	4	5	4	2	4	3	4	2	4	4	4	2	4	2	4	3	2	1	#N/A
2	40	6	#N/A	4	2	4	2	2	2	4	4	2	4	3	2	4	4	5	3	3	3	4	4	1	5	4	2	3	3	4	4	4	4	4	5	3	2	5	4	1	5	4	4	1	5	3	3	1	#N/A
2	31	3	#N/A	5	1	4	4	4	1	5	5	4	5	4	4	4	2	5	5	5	4	3	4	2	5	4	2	4	5	4	2	4	5	4	5	5	5	2	4	4	1	2	2	4	5	4	2	2	#N/A
2	43	7	#N/A	4	3	4	1	5	3	4	2	5	5	4	1	4	2	4	5	3	1	2	4	2	4	3	4	5	5	2	3	3	4	3	3	4	4	1	4	1	4	2	5	2	5	2	3	1	#N/A
1	39	7	#N/A	3	4	4	3	4	5	4	3	4	5	3	1	4	2	5	4	4	3	3	4	4	4	4	3	4	3	4	4	4	4	4	4	4	4	2	2	2	3	3	4	2	3	2	3	2	#N/A
1	41	7	#N/A	2	4	5	2	3	4	3	1	4	4	3	2	4	2	5	3	2	2	3	3	2	3	1	4	3	4	4	4	1	3	3	3	4	4	3	2	4	5	1	3	4	4	2	2	2	#N/A
1	26	5	#N/A	5	4	2	4	4	3	4	5	3	5	2	4	4	3	5	4	5	5	5	5	1	3	5	4	4	4	1	3	2	5	3	3	2	3	2	3	2	3	3	5	2	5	3	3	2	#N/A
1	25	7	#N/A	3	3	4	2	3	5	5	2	4	4	3	1	4	2	4	3	3	2	2	5	4	4	4	4	4	3	4	3	2	4	4	5	3	5	4	1	2	3	2	4	2	5	3	4	1	#N/A
1	67	6	#N/A	2	3	4	1	3	4	4	2	4	4	3	2	4	2	5	4	4	1	3	3	5	4	1	4	4	3	4	4	2	4	5	4	3	4	4	2	2	4	2	4	3	5	2	3	1	#N/A
1	54	7	#N/A	4	3	4	3	4	4	4	3	4	5	3	1	4	3	5	3	5	4	3	4	3	5	3	4	4	3	4	4	2	5	5	5	4	5	3	3	2	3	2	4	1	5	3	5	1	#N/A
2	38	5	#N/A	5	4	5	1	4	1	5	1	2	5	5	1	5	4	2	5	4	4	3	2	1	5	1	2	3	4	1	5	4	3	2	4	5	3	3	4	2	5	3	3	4	2	1	5	1	#N/A
2	46	7	#N/A	4	4	4	2	4	1	5	4	2	4	3	3	5	4	4	3	4	4	4	4	2	5	3	2	5	4	1	5	3	5	2	5	4	4	3	4	5	4	3	5	1	4	3	3	2	#N/A
2	38	7	#N/A	4	3	4	2	4	2	4	3	4	4	4	2	4	4	4	4	4	4	2	3	4	4	3	3	4	4	4	4	4	4	4	4	3	4	3	3	2	4	2	2	3	4	4	3	2	#N/A
1	48	5	#N/A	2	2	4	3	2	4	4	4	2	2	2	2	4	2	4	2	4	3	4	2	4	3	4	4	1	1	3	4	3	3	3	4	4	4	1	1	3	3	2	3	4	4	2	2	2	#N/A
1	49	4	#N/A	4	2	5	5	5	5	5	1	4	5	3	1	5	2	5	4	2	1	5	5	5	4	2	1	5	4	2	5	2	5	5	5	5	5	4	2	1	4	2	5	1	5	3	4	1	#N/A
2	23	5	#N/A	4	2	4	4	4	4	4	1	2	4	3	1	4	4	4	3	2	1	4	4	4	5	1	3	4	4	4	4	2	4	4	5	4	3	4	3	3	4	4	4	1	4	2	3	1	#N/A
2	35	7	#N/A	5	4	3	2	4	3	2	5	2	5	4	3	3	4	5	4	2	2	4	5	2	1	4	2	5	4	5	5	4	5	4	3	5	2	5	3	5	4	4	4	1	4	4	3	2	#N/A
1	30	7	#N/A	4	2	4	3	2	4	3	3	4	4	3	1	4	2	3	4	4	3	2	3	3	4	3	4	3	2	4	4	2	4	4	2	3	4	4	2	4	3	2	5	2	4	4	3	2	#N/A
1	42	7	#N/A	4	3	3	1	4	4	4	4	5	5	3	1	4	1	4	3	2	4	1	3	2	4	4	5	3	4	3	4	2	3	4	3	4	5	3	3	3	4	2	3	3	4	3	5	1	#N/A
1	26	7	#N/A	4	4	4	2	2	3	4	4	2	4	3	1	4	2	4	4	3	3	3	2	2	4	4	3	2	4	4	3	4	1	5	3	4	4	4	4	4	4	2	2	5	3	4	2	2	#N/A
1	41	7	#N/A	4	3	4	1	4	3	4	4	5	5	4	2	4	3	3	4	3	3	2	3	3	4	3	5	4	4	4	3	1	3	3	4	4	4	4	4	3	4	2	3	3	4	3	3	1	#N/A
2	59	7	#N/A	2	2	4	1	4	5	4	5	3	5	4	2	4	4	5	4	3	5	2	5	5	3	5	4	5	1	4	4	3	5	4	4	4	3	2	2	4	4	2	5	1	5	3	4	2	#N/A
1	27	5	#N/A	5	3	4	2	4	1	5	3	3	5	3	1	4	3	5	5	4	3	2	5	1	4	3	3	5	4	3	4	3	5	1	4	3	4	2	5	3	3	2	5	1	4	4	5	1	#N/A
2	23	7	#N/A	4	3	4	2	3	4	4	3	3	3	3	2	4	3	3	3	2	2	3	3	4	4	4	3	4	3	3	3	3	3	4	4	4	3	3	3	3	3	3	3	3	3	3	3	3	#N/A
1	35	5	#N/A	4	4	4	4	4	4	4	2	3	4	3	2	4	3	4	4	4	4	4	4	3	4	4	3	3	3	4	4	3	4	4	4	4	3	3	2	4	3	4	4	2	4	3	3	3	#N/A
1	45	6	#N/A	4	2	3	1	4	3	4	4	2	5	4	1	3	3	5	5	5	4	3	4	2	4	4	3	4	2	1	3	3	5	3	4	4	3	4	4	1	4	3	5	1	5	4	5	1	#N/A
1	29	5	#N/A	4	3	4	4	3	2	3	2	3	3	3	5	3	2	3	3	2	2	3	3	1	2	2	3	4	4	3	2	2	4	1	2	4	4	1	3	3	2	2	3	1	3	3	4	5	#N/A
1	26	6	#N/A	4	2	5	1	4	2	5	4	4	4	4	1	4	1	5	4	5	3	4	4	1	4	4	5	5	3	2	4	1	5	2	5	3	4	4	4	1	3	2	5	2	5	3	4	1	#N/A
2	22	7	#N/A	4	4	5	2	4	1	5	1	3	4	5	1	5	4	5	3	1	1	3	3	1	4	1	3	3	5	3	5	4	2	1	5	5	5	4	5	2	5	2	4	4	5	2	3	1	#N/A
2	57	7	#N/A	5	4	4	2	4	4	4	3	2	5	4	2	4	2	5	4	3	4	3	3	1	4	3	2	4	3	3	4	3	4	4	3	4	2	3	4	3	4	3	5	1	5	1	3	5	#N/A
2	38	7	#N/A	4	2	3	4	5	2	4	4	2	5	2	1	3	2	5	3	1	5	5	5	1	1	4	2	4	1	4	3	3	5	4	4	4	4	1	3	3	3	4	5	1	4	4	5	1	#N/A
1	35	7	#N/A	3	4	4	1	5	2	5	3	4	5	5	2	4	3	5	4	2	5	2	5	4	5	1	4	5	3	2	5	3	4	5	4	5	2	1	3	2	5	4	5	2	5	3	1	1	#N/A
1	44	7	#N/A	5	3	3	1	5	1	4	3	5	5	4	2	3	1	4	4	5	3	1	4	1	4	2	2	4	4	3	3	3	4	1	4	3	5	3	4	3	4	1	5	2	4	4	4	2	#N/A
1	36	7	#N/A	3	4	4	2	4	4	4	3	2	4	3	4	4	3	5	3	3	3	4	4	3	3	4	2	4	3	4	3	3	3	4	4	3	3	3	3	5	4	4	5	2	4	2	3	3	#N/A
2	29	7	#N/A	4	4	5	1	3	3	4	1	2	5	4	2	5	3	5	5	1	2	5	4	1	4	3	3	2	4	5	5	3	3	3	4	5	3	5	4	3	5	3	2	4	5	3	4	2	#N/A
2	24	7	#N/A	4	2	4	2	4	4	5	2	2	4	3	1	5	3	5	3	4	1	5	4	4	5	2	3	3	2	2	4	4	4	5	5	5	2	4	2	1	4	5	3	2	5	3	4	1	#N/A
1	26	7	#N/A	3	4	3	3	4	4	3	4	2	4	3	2	3	4	4	2	3	4	4	4	4	3	4	3	3	3	2	3	4	3	4	3	3	3	4	2	3	3	3	4	3	3	4	2	2	#N/A
1	42	7	#N/A	5	3	4	3	4	3	5	3	4	5	3	2	3	2	5	4	4	3	3	4	2	5	3	4	4	2	3	3	4	5	3	4	3	4	1	3	2	3	3	5	1	5	3	5	1	#N/A
1	23	5	#N/A	2	3	4	2	4	5	4	2	5	5	3	1	4	2	5	2	2	4	4	4	5	3	4	4	3	2	5	3	2	5	5	4	2	5	2	2	2	3	2	3	1	3	3	5	1	#N/A
1	29	5	#N/A	5	2	4	2	3	2	4	4	2	4	4	1	4	2	4	4	4	4	4	4	1	2	4	2	3	2	4	4	4	4	4	4	4	2	4	4	4	2	4	4	2	5	4	2	2	#N/A
1	41	7	#N/A	4	4	5	1	4	3	2	1	5	5	4	3	5	4	2	3	4	1	2	3	1	3	1	4	4	4	4	4	1	4	1	3	3	5	1	4	3	5	1	3	1	3	1	3	3	#N/A
1	36	4	#N/A	2	4	4	5	2	5	4	4	1	3	2	2	4	4	4	3	4	4	5	5	5	2	4	2	1	1	4	2	4	2	4	4	2	1	4	1	2	4	4	4	2	4	4	1	2	#N/A
2	26	6	#N/A	4	3	5	3	4	4	5	2	2	5	4	2	5	3	4	4	3	2	4	4	2	4	4	3	3	2	2	4	3	5	3	5	4	3	3	2	4	4	4	5	1	5	4	3	2	#N/A
2	27	7	#N/A	3	2	4	4	3	4	5	3	3	2	4	1	4	3	4	5	5	4	4	3	2	5	4	3	3	2	1	4	3	5	4	5	3	3	4	4	1	4	3	4	2	5	5	2	1	#N/A
1	37	3	#N/A	3	5	4	1	4	4	2	3	4	5	3	2	4	2	5	3	3	4	2	3	3	2	3	4	4	4	3	4	3	2	2	2	4	5	2	3	3	4	2	4	4	3	2	1	3	#N/A
1	71	5	#N/A	2	5	4	2	4	5	4	2	3	5	4	1	4	2	5	2	3	4	4	4	4	5	4	4	4	2	2	4	1	4	4	4	3	4	2	1	2	4	3	5	1	4	3	4	1	#N/A
1	37	3	#N/A	5	4	4	1	4	2	4	2	4	3	3	2	4	3	4	4	5	4	2	4	1	2	3	4	4	4	2	3	2	2	3	4	4	4	2	4	3	3	2	3	4	3	4	2	2	#N/A
1	21	7	#N/A	4	2	4	3	2	2	5	2	3	4	5	1	5	3	5	4	5	1	5	5	3	4	2	3	2	2	3	5	3	3	5	5	5	3	5	2	2	5	5	5	4	3	2	1	1	#N/A
1	34	7	#N/A	3	4	4	1	3	4	2	1	5	4	3	1	5	2	4	4	3	2	1	4	4	5	4	5	4	4	4	5	2	4	4	4	4	5	2	2	4	3	4	4	2	4	3	4	1	#N/A
1	21	5	#N/A	2	1	2	4	4	5	4	4	5	5	2	1	2	1	5	3	5	4	4	4	5	5	4	5	2	2	1	3	1	5	4	5	2	4	2	2	1	5	4	4	1	5	4	4	1	#N/A
1	20	5	#N/A	4	2	4	1	4	2	5	5	5	4	3	2	4	2	4	4	2	4	3	2	2	4	4	4	2	4	4	4	2	2	2	5	4	5	3	4	4	3	2	2	4	3	4	2	1	#N/A
1	23	3	#N/A	2	4	4	2	5	2	4	2	4	5	2	1	3	3	5	2	1	5	5	5	5	2	4	4	5	2	4	2	3	5	5	4	2	4	2	2	4	3	4	5	1	3	4	4	1	#N/A
2	29	5	#N/A	4	3	5	4	4	3	5	1	3	5	3	1	5	3	5	3	2	3	5	5	1	5	2	3	4	2	1	5	1	5	5	5	5	3	2	2	1	4	3	5	1	5	1	5	1	#N/A
1	26	5	#N/A	3	4	4	4	5	4	4	4	4	4	3	4	2	4	2	5	4	5	1	5	2	4	4	3	4	2	2	2	2	4	4	2	2	2	5	2	3	3	4	5	1	5	5	1	1	#N/A
1	28	3	#N/A	1	3	4	4	2	4	3	2	2	2	2	1	3	2	4	1	3	4	3	4	4	4	4	3	3	1	4	3	4	5	4	2	2	2	1	1	2	4	4	4	4	5	4	1	1	#N/A
1	29	4	#N/A	4	2	4	2	5	3	5	2	4	5	4	5	5	2	5	4	4	1	5	3	2	5	2	4	4	5	5	5	4	2	4	5	4	4	1	2	5	5	1	5	3	5	2	2	2	#N/A
1	32	2	#N/A	2	4	5	2	5	2	4	3	3	5	3	4	5	3	4	3	2	3	4	5	4	3	3	2	5	4	4	4	4	5	4	4	4	3	2	2	4	3	3	5	1	5	4	5	4	#N/A
2	45	7	#N/A	5	4	5	2	5	1	4	3	3	4	5	3	4	3	4	4	2	4	3	4	1	4	2	3	4	5	3	4	3	3	2	3	4	4	2	4	3	5	2	3	3	4	2	3	2	#N/A
1	33	3	#N/A	4	2	3	1	3	2	4	3	4	4	3	1	4	2	3	4	4	3	2	3	2	4	4	4	2	4	3	4	2	4	2	4	3	4	4	4	3	4	2	2	2	4	2	3	2	#N/A
1	40	7	#N/A	2	4	3	4	4	2	3	5	4	4	2	1	4	1	5	2	3	4	3	4	3	2	4	5	3	3	5	3	1	5	4	3	4	5	1	3	4	4	1	5	1	5	2	5	1	#N/A
1	33	3	#N/A	5	2	5	1	5	1	5	3	3	5	4	1	4	3	5	5	4	3	4	5	1	3	3	4	5	3	3	2	2	5	1	5	4	4	1	5	2	5	2	5	1	5	2	5	1	#N/A
1	39	6	#N/A	5	3	4	2	4	1	5	2	3	5	3	1	5	2	5	4	5	2	3	4	1	3	3	3	4	4	2	3	1	5	1	5	4	4	2	5	1	4	2	4	1	4	3	5	1	#N/A
1	40	7	#N/A	5	2	4	2	5	2	4	1	4	5	5	1	5	1	4	5	5	2	2	4	2	5	3	5	3	5	3	4	2	4	2	5	5	5	1	4	2	5	2	4	2	4	2	4	1	#N/A
1	24	7	#N/A	2	3	4	4	4	2	4	2	4	4	4	1	4	3	5	2	2	2	3	4	4	3	3	5	5	4	4	3	1	3	4	4	4	5	3	2	4	4	2	5	4	3	1	2	1	#N/A
1	52	7	#N/A	4	3	4	1	4	3	4	4	5	5	5	1	4	1	5	5	4	3	1	5	2	4	3	5	5	4	2	4	1	5	3	3	4	5	2	4	3	4	1	5	1	5	4	5	1	#N/A
2	31	7	#N/A	4	4	4	3	4	2	2	3	2	5	4	2	4	4	5	4	1	1	4	5	2	1	4	4	4	5	5	3	4	5	3	4	4	2	4	4	4	5	2	3	1	2	3	5	2	#N/A
1	49	6	#N/A	3	3	4	1	3	4	3	2	4	4	4	1	4	1	3	3	3	2	3	3	3	4	3	3	3	3	4	4	2	3	4	4	4	4	3	2	3	4	3	3	3	4	3	4	2	#N/A
2	57	7	#N/A	4	4	3	4	3	4	4	4	4	4	4	2	3	3	4	4	2	4	3	4	2	4	4	4	4	3	3	3	4	4	4	4	4	3	2	4	3	4	3	4	2	4	4	3	2	#N/A
1	24	7	#N/A	4	2	4	2	3	4	3	3	5	5	3	1	4	2	4	2	5	4	1	5	3	4	4	5	2	2	4	4	1	4	4	4	3	4	2	1	1	3	2	4	2	2	3	2	1	#N/A
1	25	5	#N/A	4	4	5	1	3	2	5	2	4	5	3	1	4	2	5	4	4	4	4	5	2	3	5	5	4	2	5	4	1	5	2	5	4	4	5	5	4	4	3	5	1	5	3	3	1	#N/A
1	25	7	#N/A	4	4	4	2	2	3	4	4	4	4	3	3	3	2	4	3	4	2	2	3	3	4	5	4	2	3	4	2	2	3	4	4	2	4	4	4	2	3	2	2	4	4	5	2	2	#N/A
1	45	5	#N/A	3	4	3	4	4	4	3	5	2	4	3	2	4	4	5	4	4	5	4	4	4	2	4	2	4	4	4	4	4	4	4	4	4	2	3	3	4	4	4	4	2	3	4	4	2	#N/A
2	36	7	#N/A	4	4	5	4	4	4	4	3	4	5	3	1	4	2	5	2	1	3	5	4	4	2	4	5	4	2	5	4	4	5	5	4	4	5	3	3	4	3	4	4	1	4	2	2	1	#N/A
1	41	4	#N/A	3	3	2	3	2	4	2	2	2	2	3	1	1	3	2	3	3	1	2	2	3	2	2	3	2	2	4	2	3	3	4	2	3	3	2	2	4	3	1	3	4	1	3	3	1	#N/A
1	59	7	#N/A	4	2	5	1	5	2	5	2	5	5	5	2	5	2	5	5	4	4	2	5	2	5	2	5	5	5	2	5	2	5	2	5	5	5	2	5	2	5	2	5	2	2	2	5	2	#N/A
2	45	7	#N/A	2	4	5	4	5	4	3	2	3	5	2	3	3	4	5	3	2	3	5	4	4	3	3	2	5	1	4	3	3	5	4	3	1	3	3	1	4	2	4	4	1	5	2	4	4	#N/A
2	52	7	#N/A	4	2	3	4	4	1	4	4	2	5	4	2	3	4	4	4	5	5	4	5	2	4	3	2	4	4	2	4	4	3	2	4	2	2	1	4	3	1	2	4	2	4	3	4	2	#N/A
2	31	7	#N/A	3	2	4	3	3	4	3	2	4	4	2	1	4	2	4	2	4	4	3	3	4	3	4	3	3	3	4	4	4	5	5	4	4	4	2	2	3	3	2	4	2	5	2	4	1	#N/A
2	49	7	#N/A	4	2	5	1	4	4	5	2	5	5	4	1	5	2	5	4	3	4	1	5	3	2	3	4	4	5	3	4	3	4	3	4	5	5	1	3	3	5	1	5	2	4	1	4	2	#N/A
2	54	7	#N/A	5	4	4	3	4	1	5	2	3	4	3	1	4	3	4	4	4	3	2	4	2	4	2	3	4	3	2	3	3	4	2	4	3	3	3	4	1	4	2	4	1	5	3	4	1	#N/A
2	33	7	#N/A	1	4	5	4	3	5	4	2	3	5	2	1	5	5	5	4	4	2	5	3	5	4	4	2	4	2	4	5	1	3	4	4	3	3	2	1	2	2	4	2	2	4	3	3	1	#N/A
2	38	7	#N/A	5	3	5	1	3	2	4	3	4	4	3	1	4	2	5	3	4	3	1	5	1	4	2	5	4	4	3	2	2	5	2	5	4	4	1	5	2	3	2	4	1	5	4	4	1	#N/A
1	52	7	#N/A	1	5	4	1	4	4	4	2	5	5	4	1	4	2	4	3	3	2	3	4	5	4	2	5	4	3	4	5	3	5	4	4	4	5	2	2	2	5	3	5	2	5	1	5	1	#N/A
2	58	7	#N/A	4	3	4	1	5	3	5	5	3	5	4	2	5	3	5	5	3	4	1	5	2	5	3	3	5	4	4	4	3	5	3	4	4	3	3	4	4	4	3	4	1	4	4	4	2	#N/A
1	24	7	#N/A	5	2	3	1	2	2	4	2	3	5	2	1	4	2	4	5	5	3	2	3	1	4	4	3	3	2	2	2	2	4	3	4	3	3	2	4	2	2	3	3	2	4	4	4	1	#N/A
1	42	7	#N/A	2	2	5	1	5	4	4	4	3	5	3	1	4	3	5	2	3	4	4	5	4	4	3	2	5	3	2	4	3	3	4	4	3	2	1	2	2	3	2	5	3	3	3	4	1	#N/A
1	28	7	#N/A	3	3	3	1	4	4	3	4	3	5	3	1	4	3	4	3	4	3	3	4	3	2	4	4	4	4	4	4	3	2	2	2	4	3	3	3	4	4	2	4	4	4	2	3	1	#N/A
1	23	7	#N/A	4	4	5	3	4	5	5	2	4	5	4	1	4	2	5	4	4	1	4	4	4	4	2	4	4	3	5	3	2	4	4	4	5	4	5	3	2	4	2	5	2	3	4	4	1	#N/A
1	30	7	#N/A	5	3	4	2	4	3	4	2	4	5	4	2	4	3	5	4	4	4	2	4	2	5	3	4	5	4	2	3	2	4	4	4	4	4	3	4	2	4	1	5	2	5	1	4	2	#N/A
1	30	7	#N/A	3	5	4	2	4	5	3	4	3	5	3	2	4	4	5	2	4	5	3	3	5	5	5	3	3	2	4	5	4	4	5	4	2	2	1	1	4	3	4	5	4	4	4	2	1	#N/A
1	38	7	#N/A	2	5	5	2	4	2	5	1	2	5	4	4	4	4	5	3	3	2	4	3	2	2	4	2	4	2	5	4	4	1	4	1	2	1	2	2	5	4	4	4	5	4	5	2	4	#N/A
1	38	7	#N/A	4	2	4	4	4	4	4	2	2	5	2	1	4	4	4	2	4	4	4	4	4	4	4	2	2	2	4	4	4	4	4	4	3	3	4	2	2	2	4	5	2	5	2	2	1	#N/A
1	24	4	#N/A	4	4	3	1	4	2	3	4	3	5	3	2	4	3	5	4	4	2	4	4	4	5	4	2	4	2	2	4	2	5	4	5	2	2	4	5	1	3	4	5	1	4	5	2	1	#N/A
2	30	3	#N/A	5	4	3	3	2	2	4	4	2	4	3	4	3	4	2	2	1	4	5	3	2	2	4	2	3	3	5	2	5	2	3	3	3	3	3	4	5	2	3	2	3	2	3	4	4	#N/A
1	23	5	#N/A	2	2	4	1	2	5	5	4	2	5	2	1	4	4	4	3	4	5	5	2	5	4	4	4	3	3	4	4	4	4	5	5	4	2	4	2	2	2	4	3	2	4	2	3	1	#N/A
2	50	7	#N/A	4	1	4	1	4	3	5	4	4	5	4	1	5	2	5	5	3	2	5	5	3	4	3	4	4	4	1	5	2	5	1	5	4	4	5	4	4	5	2	5	2	4	2	4	1	#N/A
1	28	6	#N/A	4	4	4	4	3	2	4	2	5	4	2	1	4	2	5	3	5	2	3	3	4	4	4	4	3	4	4	4	2	2	3	4	4	4	3	2	2	3	2	5	2	5	2	5	1	#N/A
1	34	3	#N/A	2	3	4	4	4	5	4	4	3	5	2	2	4	3	4	3	4	3	4	5	5	3	4	4	4	2	4	3	5	5	5	5	3	4	3	2	4	2	4	4	1	4	4	4	2	#N/A
1	48	6	#N/A	5	2	3	4	3	2	4	3	2	5	3	2	3	3	5	3	2	4	3	4	2	5	3	2	4	3	2	2	4	4	3	4	3	3	2	3	2	3	2	5	2	5	5	3	2	#N/A
1	30	7	#N/A	5	3	4	4	4	1	5	4	1	5	5	1	4	3	5	5	2	4	5	4	2	5	4	5	4	3	3	3	2	5	1	5	2	1	4	5	1	5	4	5	1	5	2	5	1	#N/A
2	30	7	#N/A	5	4	4	4	4	1	5	5	1	5	3	3	4	4	5	4	3	5	5	5	1	5	5	2	4	4	2	3	4	5	2	4	3	2	1	4	3	4	5	5	2	4	4	4	2	#N/A
1	36	3	#N/A	3	4	3	1	4	4	2	4	2	5	3	2	4	3	4	2	4	3	4	4	2	4	5	4	4	5	5	4	4	5	4	3	3	3	3	2	4	5	3	4	2	5	3	1	2	#N/A
2	28	5	#N/A	2	2	3	2	2	4	2	2	4	1	4	4	2	3	1	2	4	2	2	2	4	1	2	4	2	4	1	3	4	2	3	2	4	2	2	2	1	2	4	2	5	1	2	1	5	#N/A
1	54	7	#N/A	4	1	4	1	4	5	4	4	4	5	5	1	5	2	2	2	4	4	1	2	2	4	1	4	4	2	2	5	1	5	2	4	5	4	1	1	1	5	1	5	1	5	1	4	1	#N/A
3	32	7	#N/A	4	2	3	3	5	2	3	3	4	5	4	1	4	2	5	5	4	4	2	5	1	5	3	3	4	3	3	2	3	4	3	4	2	4	2	4	2	3	2	5	1	5	4	4	1	#N/A
1	46	6	#N/A	4	3	4	1	5	3	4	4	5	5	5	3	4	3	5	4	5	2	2	5	2	5	4	4	4	3	2	4	3	5	2	4	4	4	3	4	3	3	2	2	1	5	5	5	2	#N/A
2	60	6	#N/A	4	4	4	3	2	3	2	2	3	4	2	3	5	3	4	2	2	2	4	3	3	4	5	3	2	3	5	4	3	4	2	3	2	2	5	4	4	3	3	2	2	3	3	4	2	#N/A
2	43	7	#N/A	4	4	3	4	3	2	4	4	3	5	2	1	4	2	5	2	2	4	2	4	2	3	4	3	4	4	4	3	3	4	2	4	3	3	2	3	2	3	3	3	2	4	4	3	2	#N/A
2	32	6	#N/A	2	2	3	1	5	3	2	4	2	5	4	1	4	4	5	5	5	3	1	5	4	3	2	5	5	4	5	3	2	5	4	3	2	2	1	4	5	3	4	5	1	5	5	5	1	#N/A
1	44	6	#N/A	3	4	4	1	5	2	5	2	4	5	4	2	4	2	4	4	4	3	4	5	3	4	3	4	5	3	2	2	2	5	4	5	4	4	3	5	2	4	2	4	1	4	3	3	2	#N/A
1	19	5	#N/A	5	4	4	1	3	2	4	2	4	4	5	3	5	2	3	4	3	4	2	3	2	1	3	4	3	4	5	3	1	2	3	4	4	4	3	4	4	2	2	4	5	2	2	1	2	#N/A
2	38	7	#N/A	4	4	4	3	2	2	4	2	2	4	3	2	4	4	2	4	2	3	4	2	2	4	4	2	2	4	4	4	4	3	3	5	4	3	4	2	2	4	4	2	2	5	1	4	2	#N/A
1	34	7	#N/A	5	3	4	3	5	2	4	2	5	5	3	1	5	2	4	5	2	2	5	5	1	4	3	3	4	4	2	4	3	4	3	4	4	5	4	4	2	5	2	5	3	4	3	3	1	#N/A
1	30	4	#N/A	3	3	4	3	4	4	4	3	3	5	3	2	4	3	5	3	4	2	3	4	4	3	3	3	4	2	2	3	3	4	4	4	3	4	3	2	3	3	3	4	2	5	3	4	2	#N/A
2	32	7	#N/A	3	3	5	2	4	4	3	2	4	5	4	2	5	1	5	4	4	2	2	5	3	4	4	5	3	4	4	5	1	4	2	5	5	5	4	3	2	5	1	5	2	4	2	5	2	#N/A
2	18	5	#N/A	5	1	5	1	4	1	5	2	4	4	2	1	4	1	5	4	5	4	2	4	2	5	2	4	4	4	1	4	3	5	3	5	2	4	2	5	1	3	2	4	1	4	2	4	1	#N/A
2	28	6	#N/A	4	4	4	2	3	3	4	2	2	4	3	2	4	3	4	3	2	2	4	3	3	3	2	3	3	4	2	4	4	4	4	4	4	2	4	3	2	4	2	4	2	5	3	1	1	#N/A
1	60	4	#N/A	4	3	2	2	5	2	3	2	2	5	4	4	2	4	4	5	5	4	4	5	1	3	4	2	5	5	4	3	3	5	4	2	2	4	2	2	4	4	2	4	3	2	3	2	4	#N/A
1	38	7	#N/A	4	3	4	2	5	2	4	5	4	5	4	1	4	3	4	4	4	4	1	5	2	5	4	4	5	2	3	4	1	3	2	4	4	4	3	3	2	3	2	5	3	5	3	2	1	#N/A
2	49	5	#N/A	5	2	4	1	4	1	5	3	4	5	4	1	4	2	4	5	3	4	2	5	1	5	2	3	4	4	3	3	3	5	1	3	4	4	1	4	2	5	1	4	1	5	3	4	1	#N/A
1	73	7	#N/A	4	3	2	1	4	2	5	3	4	5	4	1	4	1	5	4	5	4	1	5	2	4	3	5	4	4	1	5	5	4	2	4	3	5	5	3	1	4	1	2	2	5	2	3	1	#N/A
1	51	6	#N/A	4	3	5	3	5	3	4	2	5	5	3	3	5	1	5	4	2	3	4	5	2	4	3	5	5	4	5	5	2	5	1	4	4	5	3	3	2	3	1	5	1	4	3	3	3	#N/A
2	33	7	#N/A	4	2	4	4	3	4	5	4	2	5	3	1	4	4	4	3	5	4	5	5	3	4	3	2	4	3	2	4	3	3	4	4	4	2	5	3	3	5	4	3	3	4	3	3	1	#N/A
1	25	5	#N/A	5	5	3	1	3	1	4	3	4	4	5	1	4	1	5	4	4	2	3	3	1	5	3	5	3	4	5	2	2	3	2	5	3	4	3	5	4	4	2	4	3	5	3	2	1	#N/A
1	37	7	#N/A	2	4	5	4	4	4	2	2	2	5	4	2	5	4	5	2	3	1	2	3	4	2	2	3	4	4	4	5	3	4	3	3	5	4	2	3	2	5	2	5	2	5	1	2	2	#N/A
2	27	7	#N/A	5	4	4	1	3	1	5	4	4	5	5	1	5	2	2	4	5	3	2	4	1	5	2	4	3	5	2	4	1	5	1	5	5	5	4	5	1	4	1	2	2	5	1	4	1	#N/A
2	31	7	#N/A	5	4	4	1	4	2	4	4	4	4	3	1	4	2	2	4	3	5	4	4	2	4	4	3	3	2	2	4	2	4	4	4	4	4	2	4	2	2	3	3	2	4	4	4	2	#N/A
2	34	7	#N/A	5	2	4	2	4	2	4	3	3	5	4	2	4	2	5	5	5	3	3	5	1	4	2	4	5	5	3	4	3	5	3	5	4	3	3	5	3	4	2	4	1	5	2	5	1	#N/A
2	43	3	#N/A	2	2	5	1	5	3	4	2	5	3	4	1	4	2	2	4	2	2	1	5	2	4	3	4	5	3	4	4	2	4	3	4	3	4	2	3	4	4	2	4	1	2	2	3	2	#N/A
1	40	7	#N/A	4	2	4	2	4	2	5	4	2	5	4	2	4	3	4	4	4	2	2	5	2	4	2	4	4	4	4	4	4	4	1	4	3	3	2	4	4	4	1	5	2	5	3	3	2	#N/A
1	39	7	#N/A	2	4	4	1	3	4	4	3	4	5	3	1	4	2	5	3	4	3	2	5	4	4	3	4	4	4	4	4	1	4	4	4	4	4	3	2	3	4	2	5	2	4	3	4	1	#N/A
2	22	5	#N/A	5	3	5	1	4	1	5	1	5	5	5	1	5	1	5	5	3	1	1	5	5	5	1	5	5	5	2	5	1	5	1	5	5	5	5	5	1	5	1	5	1	5	5	5	5	#N/A
1	27	5	#N/A	4	5	4	4	3	4	3	2	4	4	2	2	4	2	5	3	4	5	4	2	3	2	4	4	2	4	4	3	2	2	4	3	4	4	2	3	4	3	3	2	4	3	2	4	2	#N/A
1	28	7	#N/A	5	4	4	3	5	2	4	5	4	5	4	1	4	3	5	5	4	3	4	5	3	4	4	4	5	5	5	4	4	5	4	4	4	4	2	5	5	4	4	5	1	4	3	2	2	#N/A
2	22	5	#N/A	5	2	4	1	5	2	4	1	4	5	5	1	4	1	3	5	5	4	4	5	1	3	4	4	4	4	5	4	3	5	3	5	4	4	4	5	3	5	2	2	1	4	5	4	1	#N/A
2	42	7	#N/A	5	4	4	5	4	3	5	3	2	5	3	4	4	4	4	4	5	5	5	4	3	5	5	1	5	2	5	5	5	5	3	5	3	3	2	4	2	3	4	5	1	5	5	4	4	#N/A
2	35	5	#N/A	3	5	4	3	5	4	4	4	4	5	2	2	4	4	5	2	1	4	4	4	4	4	5	3	4	2	5	4	4	5	5	4	2	3	5	1	2	2	4	5	2	4	4	4	2	#N/A
1	21	5	#N/A	2	3	4	4	3	4	4	4	3	3	3	1	4	3	5	3	4	3	5	2	4	4	4	3	3	2	4	3	3	4	4	4	4	3	3	3	4	4	4	3	3	4	3	4	1	#N/A
1	27	3	#N/A	3	4	2	3	4	4	4	4	2	4	2	1	2	4	5	4	4	5	5	3	3	4	5	2	5	3	4	2	3	3	5	5	2	2	1	3	2	2	5	5	3	4	5	2	1	#N/A
1	37	4	#N/A	4	4	5	4	5	5	3	4	2	5	2	2	5	4	5	2	2	4	4	5	4	3	4	4	4	1	4	4	4	3	5	4	2	2	4	2	3	3	2	4	4	4	5	4	3	#N/A
1	34	6	#N/A	4	1	4	2	3	2	4	1	3	4	4	3	4	3	4	3	4	4	2	5	2	2	2	3	4	2	2	4	4	4	2	5	4	2	3	4	2	4	3	4	4	5	4	1	2	#N/A
1	62	7	#N/A	5	3	5	1	4	2	4	2	4	4	4	1	5	2	5	4	4	1	3	3	1	4	1	4	3	4	2	4	1	4	2	4	4	4	4	5	2	5	2	3	2	5	1	4	1	#N/A
2	19	5	#N/A	4	4	4	1	4	2	4	4	4	5	4	2	4	4	3	5	4	4	3	4	2	5	4	4	4	3	4	4	3	3	3	4	4	4	3	4	4	4	2	5	3	4	4	1	1	#N/A
1	57	7	#N/A	3	3	5	1	5	3	3	1	4	5	4	1	5	3	2	3	4	3	1	5	2	4	3	5	5	2	3	4	3	2	3	4	4	4	1	3	2	3	3	5	3	3	2	2	2	#N/A
1	31	6	#N/A	2	5	4	2	3	4	4	2	4	5	4	1	4	2	3	2	2	4	2	3	5	2	3	3	4	3	5	4	2	1	2	2	5	4	3	1	4	2	2	5	4	3	2	1	1	#N/A
1	62	7	#N/A	4	4	3	4	3	4	5	4	2	5	3	3	4	4	5	3	4	5	4	3	3	4	4	3	3	3	2	3	4	3	4	4	3	3	4	4	4	3	4	3	4	5	4	4	3	#N/A
2	52	7	#N/A	4	2	5	2	3	4	3	2	2	2	2	2	5	4	2	2	2	3	2	3	2	5	5	3	3	4	2	4	4	4	3	4	3	2	4	4	3	4	3	2	4	2	4	2	1	#N/A
3	60	6	#N/A	5	3	5	1	4	4	5	1	2	5	4	1	5	2	4	5	3	4	4	5	1	5	1	2	3	2	1	5	1	5	5	5	3	2	1	3	2	4	4	3	1	4	1	3	1	#N/A
1	39	7	#N/A	4	2	3	4	4	2	4	4	4	4	4	2	3	4	4	4	4	4	2	5	2	4	4	4	4	4	2	3	2	5	2	4	2	4	4	5	2	4	2	5	1	4	4	5	1	#N/A
1	54	5	#N/A	4	4	4	2	5	2	5	4	5	5	4	2	4	1	5	5	5	4	2	5	2	5	2	5	5	4	2	4	1	5	2	5	4	5	1	4	2	4	1	5	1	5	2	5	2	#N/A
2	25	6	#N/A	4	4	5	3	4	3	4	4	2	5	5	2	4	2	5	4	4	2	3	4	2	3	2	3	4	4	4	4	4	3	4	4	4	3	3	4	4	3	4	4	2	2	3	2	1	#N/A
1	54	7	#N/A	3	4	4	2	4	5	4	4	3	5	4	2	5	3	4	3	4	5	4	3	4	4	4	3	4	3	2	4	3	5	2	4	3	4	2	2	2	3	2	4	1	3	2	4	2	#N/A
2	24	7	#N/A	5	3	4	1	4	1	4	2	4	4	5	1	5	1	5	5	3	2	3	5	1	5	2	4	4	4	2	3	3	4	2	4	4	3	2	5	1	4	3	4	2	2	3	4	1	#N/A
1	20	5	#N/A	2	4	4	4	2	5	3	4	4	4	2	2	4	2	4	4	2	2	4	4	4	2	4	4	4	2	5	4	2	4	4	2	3	4	5	2	4	4	4	4	2	4	2	4	2	#N/A
1	23	4	#N/A	2	4	4	2	5	4	3	4	5	4	4	3	4	2	5	3	4	4	4	5	4	2	3	4	5	3	3	4	2	4	4	4	4	5	5	3	2	4	1	5	3	2	1	4	2	#N/A
1	32	4	#N/A	3	3	4	4	3	4	4	4	3	4	1	3	4	3	5	3	3	3	1	3	4	3	4	3	3	3	4	4	4	4	5	4	3	3	4	2	4	2	3	5	2	4	3	3	2	#N/A
2	30	7	#N/A	2	4	4	4	2	5	4	2	2	4	1	2	2	5	5	2	1	2	5	5	5	1	4	2	4	4	4	4	2	4	4	2	4	2	5	1	5	2	3	3	1	4	3	5	3	#N/A
2	41	6	#N/A	3	2	5	1	4	4	4	2	4	5	2	1	5	2	3	2	4	4	1	4	4	4	4	4	3	2	2	2	3	3	3	4	3	3	2	2	1	2	2	3	3	5	3	5	1	#N/A
2	31	5	#N/A	4	2	4	5	2	1	4	4	2	3	4	1	4	4	3	3	3	2	5	4	4	4	3	2	2	2	4	4	4	1	4	4	3	2	4	3	4	4	4	2	5	5	5	1	2	#N/A
2	60	7	#N/A	5	1	4	3	4	1	4	2	4	5	4	1	4	1	4	4	4	3	2	4	1	4	3	4	4	2	1	4	2	4	3	4	4	4	2	4	1	5	2	4	2	5	2	4	1	#N/A
2	23	3	#N/A	4	1	4	2	3	4	5	4	3	5	2	2	4	3	4	2	2	4	4	4	2	2	4	4	2	2	4	2	4	4	4	5	2	4	5	2	2	3	4	3	2	4	4	4	2	#N/A
1	20	3	#N/A	4	3	3	2	4	2	4	4	2	5	4	3	4	3	4	3	4	2	4	4	3	3	2	3	4	4	4	3	4	2	2	4	4	4	4	4	3	4	4	3	2	4	4	3	3	#N/A
2	54	7	#N/A	5	4	4	5	3	4	4	2	4	5	2	2	5	4	5	4	2	2	5	3	3	2	4	2	2	4	4	3	4	5	5	4	4	4	4	3	3	4	4	3	2	3	4	4	2	#N/A
1	24	3	#N/A	5	4	3	1	3	4	4	3	4	5	4	1	3	2	4	4	4	4	5	4	4	5	4	4	4	3	4	4	4	5	4	5	3	4	4	3	4	4	3	5	2	4	4	3	1	#N/A
2	59	5	#N/A	1	2	5	1	5	1	4	1	2	5	5	1	5	4	4	5	4	1	2	5	1	5	1	2	5	5	2	4	4	4	1	5	5	4	1	5	1	5	2	4	2	2	2	4	1	#N/A
1	18	5	#N/A	2	3	2	4	2	5	2	4	3	3	2	1	4	4	5	1	4	2	4	4	5	1	5	3	4	1	5	2	4	1	5	4	4	3	3	1	4	3	4	4	2	5	4	4	1	#N/A
2	22	7	#N/A	4	3	5	3	4	2	4	1	3	4	4	1	5	2	3	4	4	1	4	4	2	4	2	3	4	4	2	5	2	4	3	4	4	4	4	4	2	4	2	2	2	5	2	2	1	#N/A
2	22	7	#N/A	4	4	5	3	3	5	5	1	2	4	3	1	5	1	4	2	4	1	4	4	5	4	2	4	4	1	4	2	2	5	5	5	4	4	5	1	3	4	2	4	1	5	4	3	1	#N/A
2	27	5	#N/A	2	2	3	4	3	3	3	3	2	2	2	1	4	1	4	4	5	4	3	3	5	5	5	4	4	2	3	2	5	5	5	4	3	5	1	3	2	3	3	2	2	5	4	5	1	#N/A
1	35	7	#N/A	2	3	4	4	1	4	4	3	4	2	1	1	4	3	2	1	4	1	2	1	5	4	4	3	1	2	4	4	1	2	5	3	4	4	5	3	1	4	3	4	5	3	5	2	1	#N/A
2	23	3	#N/A	5	3	5	2	4	1	4	3	4	5	2	2	4	2	4	4	5	1	4	4	1	4	4	4	4	4	3	4	2	2	1	4	4	4	3	5	3	4	2	3	3	5	4	3	2	#N/A
2	28	7	#N/A	4	3	4	2	3	3	2	1	2	4	4	2	4	2	4	2	3	2	4	3	2	4	2	3	3	4	2	2	3	4	4	4	4	2	4	3	3	4	3	4	2	4	2	3	3	#N/A
2	62	3	#N/A	1	4	4	1	3	5	5	5	5	2	4	2	3	2	3	2	1	4	3	2	5	2	2	5	2	3	4	4	1	2	5	3	4	5	5	1	3	4	2	1	5	3	4	1	1	#N/A
2	53	2	#N/A	5	5	3	5	3	1	2	5	1	2	1	5	4	4	2	2	1	5	5	3	3	5	5	1	2	2	5	2	5	2	2	2	2	2	5	1	5	2	4	5	5	3	5	4	5	#N/A
2	43	3	#N/A	5	3	5	3	3	2	5	1	4	5	4	1	5	3	5	5	1	1	5	5	2	4	1	2	5	3	2	5	4	5	2	5	5	2	3	5	3	5	3	5	1	3	1	4	1	#N/A
2	19	3	#N/A	5	4	2	1	4	1	2	4	2	4	4	1	4	1	4	4	5	2	1	3	1	3	4	2	4	5	2	4	2	4	2	4	2	2	4	4	2	4	2	4	2	4	2	4	1	#N/A
2	26	4	#N/A	3	4	3	4	4	5	4	4	2	4	2	1	4	4	5	2	5	4	4	4	4	5	5	2	3	1	2	2	4	5	5	5	2	2	3	3	2	2	4	4	2	5	4	4	1	#N/A
2	28	7	#N/A	4	1	5	3	3	3	5	3	4	4	3	2	4	3	4	3	4	4	4	3	4	4	4	3	3	2	2	4	4	4	3	4	4	4	4	4	2	4	4	4	3	5	4	3	2	#N/A
2	35	7	#N/A	5	2	3	2	4	3	3	4	2	5	3	1	3	3	4	4	4	2	3	5	3	4	3	4	4	3	3	1	3	4	3	5	2	2	3	4	3	3	4	4	2	3	5	3	1	#N/A
1	31	7	#N/A	4	4	4	3	4	2	4	4	4	5	4	1	4	3	5	4	5	5	1	4	1	4	4	4	4	4	4	3	3	4	4	3	3	4	2	4	4	4	2	4	3	4	5	1	2	#N/A
1	18	5	#N/A	4	2	4	1	4	3	4	4	5	3	4	1	4	2	3	4	5	4	2	4	3	5	3	5	3	3	4	5	2	3	4	5	3	4	4	4	2	3	2	4	4	3	2	4	1	#N/A
2	26	7	#N/A	4	1	5	2	4	5	4	2	2	4	4	1	4	4	5	3	3	3	3	4	4	4	3	4	4	3	5	2	3	4	4	4	4	4	4	4	4	4	4	4	1	3	4	5	1	#N/A
1	41	6	#N/A	4	4	5	3	4	2	4	3	3	5	4	1	5	3	4	5	2	4	3	4	3	3	4	4	4	4	3	4	3	4	3	5	4	4	4	4	4	4	3	4	3	4	2	4	1	#N/A
2	37	7	#N/A	4	2	5	2	4	4	4	1	2	4	4	2	5	2	4	5	4	1	4	4	2	5	1	3	4	4	3	5	4	4	2	5	5	4	2	4	2	4	3	4	2	5	1	3	1	#N/A
2	18	5	#N/A	3	2	2	4	1	1	3	2	2	5	2	2	4	4	5	3	4	5	5	5	2	5	5	2	2	4	5	2	4	5	2	3	2	1	1	3	5	3	5	5	3	2	3	2	2	#N/A
2	23	5	#N/A	4	4	3	5	4	5	4	5	3	4	1	3	5	2	4	3	3	5	5	5	4	3	5	3	4	5	5	4	3	4	5	5	3	4	3	2	4	1	5	5	1	3	3	4	3	#N/A
1	20	5	#N/A	4	2	2	3	2	1	4	5	4	4	4	1	3	3	4	4	4	4	4	4	1	4	5	4	3	3	2	2	4	5	2	4	1	5	3	5	3	1	2	4	2	3	5	3	1	#N/A
2	28	4	#N/A	5	2	5	4	2	2	4	3	2	4	3	2	5	2	3	3	3	3	3	4	1	4	2	3	2	3	2	4	4	2	2	4	4	2	4	4	2	3	2	2	4	4	2	1	1	#N/A
2	35	5	#N/A	4	4	4	3	4	4	4	3	2	5	4	2	4	4	5	4	4	2	3	4	4	4	2	3	3	3	4	4	4	5	4	4	4	3	4	3	4	5	3	3	2	4	3	4	2	#N/A
2	53	7	#N/A	3	4	5	2	4	3	4	1	3	5	4	3	5	3	4	3	2	1	3	4	3	3	1	3	4	3	3	5	3	3	3	3	5	3	3	3	4	5	3	4	2	3	1	3	3	#N/A
1	66	7	#N/A	1	1	5	1	4	4	4	2	5	5	4	1	4	2	1	4	4	2	1	4	5	3	4	5	4	2	2	5	2	3	4	4	4	4	5	1	2	4	1	4	3	4	3	2	1	#N/A
1	18	6	#N/A	5	2	5	3	4	2	2	4	4	5	3	1	4	3	5	2	4	4	3	4	2	4	4	3	3	4	3	3	5	5	4	5	3	4	5	4	2	2	2	3	4	2	4	5	2	#N/A
2	23	5	#N/A	4	3	5	5	4	4	4	2	2	4	3	1	5	2	4	5	3	1	5	5	5	4	3	1	4	1	3	3	4	5	5	5	4	3	2	3	2	4	5	4	1	2	4	5	1	#N/A
2	45	7	#N/A	3	4	4	4	3	4	2	3	3	5	2	3	4	4	5	4	4	4	3	4	3	2	3	2	3	3	4	4	4	4	4	4	4	3	2	3	2	3	3	2	2	4	3	3	3	#N/A
1	24	7	#N/A	5	4	5	1	2	3	5	3	5	4	3	2	5	1	4	4	5	4	1	1	3	5	2	5	3	5	5	4	1	1	4	3	5	5	3	4	2	2	1	2	5	5	4	1	2	#N/A
2	24	5	#N/A	5	5	2	4	4	3	4	5	2	5	4	4	2	4	5	4	4	3	5	4	2	3	4	2	2	4	4	2	5	4	2	4	2	2	4	4	4	2	2	5	2	4	4	3	3	#N/A
1	33	7	#N/A	3	4	2	5	2	3	4	4	1	5	2	2	3	4	4	3	2	4	5	3	2	2	4	1	2	3	3	2	4	5	4	4	2	1	3	2	3	3	4	3	1	5	4	4	2	#N/A
2	21	5	#N/A	4	4	5	2	3	3	4	4	2	3	3	1	4	4	4	4	3	5	2	3	2	4	4	5	3	3	4	3	4	5	4	4	3	2	4	3	2	2	5	4	2	4	4	4	1	#N/A
2	31	7	#N/A	5	3	5	1	3	1	4	1	4	4	4	1	5	2	4	4	4	1	2	3	1	5	2	4	2	5	4	5	1	4	1	5	5	3	3	5	3	4	3	2	2	4	1	4	1	#N/A
1	46	7	#N/A	4	4	5	1	5	2	4	3	3	5	5	3	5	4	4	4	2	1	3	5	3	2	3	3	5	5	4	5	3	5	3	4	4	3	3	3	4	4	3	4	1	3	4	4	2	#N/A
1	45	7	#N/A	4	3	5	2	3	2	4	1	4	5	3	2	4	3	5	4	4	2	2	5	3	4	3	4	4	4	3	4	3	4	1	4	4	4	3	4	2	3	1	4	2	4	3	4	4	#N/A
1	46	7	#N/A	5	2	4	2	2	2	3	4	4	3	2	2	4	2	5	3	3	2	2	2	2	5	4	4	3	4	4	4	2	4	2	4	3	5	3	5	4	3	1	5	3	4	2	5	1	#N/A
2	27	7	#N/A	5	4	3	2	4	1	4	4	3	5	2	2	4	3	2	4	2	4	3	4	1	3	5	3	4	5	2	2	2	5	2	4	3	3	4	4	3	5	2	4	1	3	5	4	2	#N/A
1	30	7	#N/A	5	4	5	1	4	3	5	2	2	5	5	5	5	5	5	5	5	1	4	5	3	5	3	2	4	5	4	3	5	2	2	4	5	5	5	5	5	4	4	3	3	4	5	4	3	#N/A
2	18	5	#N/A	4	2	5	1	5	3	5	4	4	5	5	3	5	2	5	5	4	2	5	5	2	5	5	4	5	2	3	4	2	4	4	5	3	4	4	4	1	3	4	5	1	4	5	5	1	#N/A
2	47	3	#N/A	5	2	5	1	4	1	5	3	3	5	4	1	5	3	2	4	4	1	3	5	1	4	4	3	4	4	4	5	1	1	3	3	5	4	2	3	4	4	1	1	5	5	1	1	1	#N/A
[truncated: 13 more columns]

## Sheet: Codebook
Variable	Explanation	Response options
gender	gender of participant	1 = male, 2 = female
age	age of participant
education	highest educational level	1=no graduation ("ohne Schulabschluss"), 2=streamed secondary school for lesser able students ("Volks/-Hauptschulabschluss"), 3=secondary school leaving certificate ("Mittlere Reife"), 4=vocational baccalaureate diploma ("Fachabitur"), 5=A-level / High school diploma ("Abitur"), 6=university of applied sciences degree ("Fachhochschulabschluss"), 7=university degree ("Hochschulabschluss")
...25
BFI_1	Big Five Inventory (Rammstedt & Danner, 2017) Item 01	1 = very inapplicable, 2, 3, 4, 5 = very applicable
BFI_2	Big Five Inventory (Rammstedt & Danner, 2017) Item 02	1 = very inapplicable, 2, 3, 4, 5 = very applicable
BFI_3	Big Five Inventory (Rammstedt & Danner, 2017) Item 03	1 = very inapplicable, 2, 3, 4, 5 = very applicable
BFI_4	Big Five Inventory (Rammstedt & Danner, 2017) Item 04	1 = very inapplicable, 2, 3, 4, 5 = very applicable
BFI_5	Big Five Inventory (Rammstedt & Danner, 2017) Item 05	1 = very inapplicable, 2, 3, 4, 5 = very applicable
BFI_6	Big Five Inventory (Rammstedt & Danner, 2017) Item 06	1 = very inapplicable, 2, 3, 4, 5 = very applicable
BFI_7	Big Five Inventory (Rammstedt & Danner, 2017) Item 07	1 = very inapplicable, 2, 3, 4, 5 = very applicable
BFI_8	Big Five Inventory (Rammstedt & Danner, 2017) Item 08	1 = very inapplicable, 2, 3, 4, 5 = very applicable
BFI_9	Big Five Inventory (Rammstedt & Danner, 2017) Item 09	1 = very inapplicable, 2, 3, 4, 5 = very applicable
BFI_10	Big Five Inventory (Rammstedt & Danner, 2017) Item 10	1 = very inapplicable, 2, 3, 4, 5 = very applicable
BFI_11	Big Five Inventory (Rammstedt & Danner, 2017) Item 11	1 = very inapplicable, 2, 3, 4, 5 = very applicable
BFI_12	Big Five Inventory (Rammstedt & Danner, 2017) Item 12	1 = very inapplicable, 2, 3, 4, 5 = very applicable
BFI_13	Big Five Inventory (Rammstedt & Danner, 2017) Item 13	1 = very inapplicable, 2, 3, 4, 5 = very applicable
BFI_14	Big Five Inventory (Rammstedt & Danner, 2017) Item 14	1 = very inapplicable, 2, 3, 4, 5 = very applicable
BFI_15	Big Five Inventory (Rammstedt & Danner, 2017) Item 15	1 = very inapplicable, 2, 3, 4, 5 = very applicable
BFI_16	Big Five Inventory (Rammstedt & Danner, 2017) Item 16	1 = very inapplicable, 2, 3, 4, 5 = very applicable
BFI_17	Big Five Inventory (Rammstedt & Danner, 2017) Item 17	1 = very inapplicable, 2, 3, 4, 5 = very applicable
BFI_18	Big Five Inventory (Rammstedt & Danner, 2017) Item 18	1 = very inapplicable, 2, 3, 4, 5 = very applicable
BFI_19	Big Five Inventory (Rammstedt & Danner, 2017) Item 19	1 = very inapplicable, 2, 3, 4, 5 = very applicable
BFI_20	Big Five Inventory (Rammstedt & Danner, 2017) Item 20	1 = very inapplicable, 2, 3, 4, 5 = very applicable
BFI_21	Big Five Inventory (Rammstedt & Danner, 2017) Item 21	1 = very inapplicable, 2, 3, 4, 5 = very applicable
BFI_22	Big Five Inventory (Rammstedt & Danner, 2017) Item 22	1 = very inapplicable, 2, 3, 4, 5 = very applicable
BFI_23	Big Five Inventory (Rammstedt & Danner, 2017) Item 23	1 = very inapplicable, 2, 3, 4, 5 = very applicable
BFI_24	Big Five Inventory (Rammstedt & Danner, 2017) Item 24	1 = very inapplicable, 2, 3, 4, 5 = very applicable
BFI_25	Big Five Inventory (Rammstedt & Danner, 2017) Item 25	1 = very inapplicable, 2, 3, 4, 5 = very applicable
BFI_26	Big Five Inventory (Rammstedt & Danner, 2017) Item 26	1 = very inapplicable, 2, 3, 4, 5 = very applicable
BFI_27	Big Five Inventory (Rammstedt & Danner, 2017) Item 27	1 = very inapplicable, 2, 3, 4, 5 = very applicable
BFI_28	Big Five Inventory (Rammstedt & Danner, 2017) Item 28	1 = very inapplicable, 2, 3, 4, 5 = very applicable
BFI_29	Big Five Inventory (Rammstedt & Danner, 2017) Item 29	1 = very inapplicable, 2, 3, 4, 5 = very applicable
BFI_30	Big Five Inventory (Rammstedt & Danner, 2017) Item 30	1 = very inapplicable, 2, 3, 4, 5 = very applicable
BFI_31	Big Five Inventory (Rammstedt & Danner, 2017) Item 31	1 = very inapplicable, 2, 3, 4, 5 = very applicable
BFI_32	Big Five Inventory (Rammstedt & Danner, 2017) Item 32	1 = very inapplicable, 2, 3, 4, 5 = very applicable
BFI_33	Big Five Inventory (Rammstedt & Danner, 2017) Item 33	1 = very inapplicable, 2, 3, 4, 5 = very applicable
BFI_34	Big Five Inventory (Rammstedt & Danner, 2017) Item 34	1 = very inapplicable, 2, 3, 4, 5 = very applicable
BFI_35	Big Five Inventory (Rammstedt & Danner, 2017) Item 35	1 = very inapplicable, 2, 3, 4, 5 = very applicable
BFI_36	Big Five Inventory (Rammstedt & Danner, 2017) Item 36	1 = very inapplicable, 2, 3, 4, 5 = very applicable
BFI_37	Big Five Inventory (Rammstedt & Danner, 2017) Item 37	1 = very inapplicable, 2, 3, 4, 5 = very applicable
BFI_38	Big Five Inventory (Rammstedt & Danner, 2017) Item 38	1 = very inapplicable, 2, 3, 4, 5 = very applicable
BFI_39	Big Five Inventory (Rammstedt & Danner, 2017) Item 39	1 = very inapplicable, 2, 3, 4, 5 = very applicable
BFI_40	Big Five Inventory (Rammstedt & Danner, 2017) Item 40	1 = very inapplicable, 2, 3, 4, 5 = very applicable
BFI_41	Big Five Inventory (Rammstedt & Danner, 2017) Item 41	1 = very inapplicable, 2, 3, 4, 5 = very applicable
BFI_42	Big Five Inventory (Rammstedt & Danner, 2017) Item 42	1 = very inapplicable, 2, 3, 4, 5 = very applicable
BFI_43	Big Five Inventory (Rammstedt & Danner, 2017) Item 43	1 = very inapplicable, 2, 3, 4, 5 = very applicable
BFI_44	Big Five Inventory (Rammstedt & Danner, 2017) Item 44	1 = very inapplicable, 2, 3, 4, 5 = very applicable
BFI_45	Big Five Inventory (Rammstedt & Danner, 2017) Item 45	1 = very inapplicable, 2, 3, 4, 5 = very applicable
...71
pay_social_media_marketing	“if thereby it is ensured that my data accrued there is not used for marketing purposes”	1 = strongly disagree, 2, 3, 4, 5 = strongly agree
pay_social_media_datasafety	“if thereby it is ensured that my data accrued there is better protected”	1 = strongly disagree, 2, 3, 4, 5 = strongly agree
pay_social_media_noprolongtime	“if thereby it is ensured that the social media offers are designed in a way not aiming at prolonging the online time of the users”	1 = strongly disagree, 2, 3, 4, 5 = strongly agree
pay_social_media_fnradi	“if thereby it gets ensured that the problem of fake news and radicalization is reduced”	1 = strongly disagree, 2, 3, 4, 5 = strongly agree
...76
how_much_pay_socialmedia	How much (in €) participant would be willng to pay for one social media service per month.
how_much_pay_messenger	How much (in €) participant would be willng to pay for one messaging service per month.
...81
no_social_media	I do not use social media at all.	1 = yes, 2 = no
no_messenger	I do not use messaging services at all.	1 = yes, 2 = no
...82
how_much_pay_socialmedia_replaced	How much (in €) participant would be willng to pay for one social media service per month. (outliers replaced)
how_much_pay_messenger_replaced	How much (in €) participant would be willng to pay for one messaging service per month. (outliers replaced)
